# Supplementary material
Source: publisher site journal article supplement (https://www.dovepress.com/get_supplementary_file.php?f=338225.docx)
Supplement: Supplementary file 1 [file get_supplementary_file.php]

**Appendix 1: Search strategy**

Search terms for EMBASE via www.embase.com

Date of the search: 16/04/2021

| No | Query1,2,3 | Results |
| --- | --- | --- |
| #1 | 'coronavirus disease 2019'/exp OR 'coronavirus disease 2019' OR 'covid 19'/exp OR 'covid 19' OR 'covid19'/exp OR 'covid19' OR 'covid-19'/exp OR 'covid-19' OR 'sars-cov-2'/exp OR 'sars-cov-2' OR 'severe acute respiratory syndrome coronavirus 2'/exp OR 'severe acute respiratory syndrome coronavirus 2' OR '2019ncov' OR 19ncov OR covid OR 'sarscov-2' OR 'sars-cov2' OR sarscov2 OR 'severe acute respiratory syndrome corona virus 2' | 127,907 |
| #2 | 'sars-related coronavirus'/exp | 31,538 |
| #3 | ('coronavirinae'/exp OR 'betacoronavirus'/exp OR 'coronavirus infection'/exp) AND (epidemic OR pandemic) | 72,241 |
| #4 | #1 OR #2 OR #3 | 137,636 |
| #5 | ‘socioeconomics’/exp | 425,567 |
| #6 | ‘cost benefit analysis’/exp | 86,563 |
| #7 | ‘cost effectiveness analysis’/exp | 158,351 |
| #8 | ‘cost of illness’/exp | 19,702 |
| #9 | ‘cost control’/exp | 70,324 |
| #10 | ‘economic aspect’/exp | 1,818,419 |
| #11 | ‘financial management’/exp | 460,583 |
| #12 | ‘health care cost’/exp | 303,184 |
| #13 | ‘health care financing’/exp | 13,440 |
| #14 | ‘health economics’/exp | 925,416 |
| #15 | ‘hospital cost’/exp | 40,389 |
| #16 | fiscal:ti OR financial:ti OR finance:ti OR funding:ti | 25,703 |
| #17 | ‘cost minimization analysis’/exp | 3,617 |
| #18 | (cost NEAR/1 estimate$):ti,ab | 7,693 |
| #19 | (cost NEAR/1 variable$):ti,ab | 649 |
| #20 | (unit NEAR/1 cost$):ti,ab | 4,837 |
| #21 | ‘markov chains’/de | 7,019 |
| #22 | markov:ti,ab | 30,205 |
| #23 | ‘monte carlo method’/de | 42,842 |
| #24 | ‘monte carlo’:ti,ab | 51,243 |
| #25 | ‘decision theory’/exp | 1,770 |
| #26 | (decision* NEAR/2 (tree* or analy* or model*)):ti,ab | 36,769 |
| #27 | #5 OR #6 OR #7 OR #8 OR #9 OR #10 OR #11 OR #12 OR #13 OR #14 OR #15 OR #16 OR #17 OR #18 OR #19 OR #20 OR #21 OR #22 OR #23 OR #24 OR #25 OR #26 | 1,917,177 |
| #28 | #4 AND #27 | 14,546 |
| #29 | #28 AND (‘Article’/it OR ‘Article in Press’/it OR ‘Conference Abstract’/it) | 8,532 |
| #30 | #28 AND ('article'/it OR 'article in press'/it OR 'conference abstract'/it) | 9,015 |

1. CADTH COVID-19 Search Strings - <https://covid.cadth.ca/literature-searching-tools/cadth-covid-19-search-strings/>
2. Scottish Intelligence Guidelines Network (SIGN) filter - <https://www.sign.ac.uk/what-we-do/methodology/search-filters/>
3. CADTH EE Search Strings: <https://www.cadth.ca/resources/finding-evidence/strings-attached-cadths-database-search-filters>

Search terms for MEDLINE and MEDLINE-IN-PROCESS via <https://pubmed.ncbi.nlm.nih.gov/>

Date of the search: 16/04/2021

| No | Query1,2,3 | Results |
| --- | --- | --- |
| #1 | “coronavirus disease 2019” OR “covid 19” OR “covid19” OR “covid-19” OR “sars-cov-2” OR “severe acute respiratory syndrome coronavirus 2” OR “severe acute respiratory syndrome corona virus 2” OR “2019ncov” OR “19ncov” OR covid OR “sarscov-2” OR “sars-cov2” OR sarscov2 | 122,828 |
| #2 | “sars-related coronavirus” | 39 |
| #3 | (coronavirinae or betacoronavirus OR coronavirus infection) AND (epidemic or pandemic) | 73,387 |
| #4 | #1 OR #2 OR #3 | 129,247 |
| #5 | “costs and cost analysis” [mh] | 244,039 |
| #6 | economics [mh] | 616,008 |
| #7 | cost allocation [mh] | 2,008 |
| #8 | cost benefit analysis [mh] | 84,041 |
| #9 | cost control [mh] | 33,507 |
| #10 | cost savings [mh] | 12,164 |
| #11 | cost of illness [mh] | 28,549 |
| #12 | cost sharing [mh] | 4,565 |
| #13 | deductibles and coinsurance [mh] | 1,779 |
| #14 | medical savings accounts [mh] | 540 |
| #15 | health care costs [mh] | 67,499 |
| #16 | direct service costs [mh] | 1,202 |
| #17 | drug costs [mh] | 16,524 |
| #18 | employer health costs [mh] | 1,094 |
| #19 | hospital costs [mh] | 11,426 |
| #20 | economics, pharmaceutical [mh] | 2,980 |
| #21 | economics, nursing [mh] | 4,002 |
| #22 | economics, medical [mh] | 14,254 |
| #23 | economics, hospital [mh] | 25,051 |
| #24 | value of life [mh] | 5,743 |
| #25 | capital expenditures [mh] | 1,996 |
| #26 | health expenditures [mh] | 23,135 |
| #27 | budgets [mh] | 13,811 |
| #28 | fees and charges [mh] | 30,646 |
| #29 | fiscal [tw] OR funding [tw] OR financial [tw] OR finance [tw] | 181,624 |
| #30 | economic* [tw] OR pharmacoeconomic* [tw] OR price* [tw] OR pricing [tw] | 730,729 |
| #31 | (unit cost* [tiab]) | 2,672 |
| #32 | cost variable [tiab] | 46 |
| #33 | (cost estimate* [tiab]) | 2,328 |
| #34 | (healthcare cost* [tiab]) | 12,944 |
| #35 | “high cost” [tiab] | 14,680 |
| #36 | “low cost” [tiab] | 64,751 |
| #37 | markov chains[mh] OR markov[tiab] OR monte carlo method[mh] OR monte carlo[tiab] OR Decision Theory[mh] OR decision tree*[tiab] OR decision analy*[tiab] OR decision model*[tiab] | 107,001 |
| #38 | #5 OR #6 OR #7 OR #8 OR #9 OR #10 OR #11 OR #12 OR #13 OR #14 OR #15 OR #16 OR #17 OR #18 OR #19 OR #20 OR #21 OR #22 OR #23 OR #24 OR #25 OR #26 OR #27 OR #28 OR #29 OR #30 OR #31 OR #32 OR #33 OR #34 OR #35 OR #36 OR #37 | 1,243,726 |
| #39 | #4 AND #38 | 9,493 |

1. CADTH COVID-19 Search Strings - <https://covid.cadth.ca/literature-searching-tools/cadth-covid-19-search-strings/>
2. Scottish Intelligence Guidelines Network (SIGN) filter - <https://www.sign.ac.uk/what-we-do/methodology/search-filters/>
3. CADTH EE Search Strings: <https://www.cadth.ca/resources/finding-evidence/strings-attached-cadths-database-search-filters>

Search terms in Cochrane Library via http://www.cochranelibrary.com/

Date of the search: 16/04/2021

| No | Query1 | Results |
| --- | --- | --- |
| #1 | 'coronavirus disease 2019' OR 'covid 19' OR 'covid19' OR 'covid-19' OR 'sars-cov-2' OR 'severe acute respiratory syndrome coronavirus 2' OR '2019ncov' OR 19ncov OR covid OR 'sarscov-2' OR 'sars-cov2' OR sarscov2 OR 'severe acute respiratory syndrome corona virus 2' | 5,112 |
| #2 | #1 AND Limits: No trials | 113 |

1. CADTH COVID-19 Search Strings - <https://covid.cadth.ca/literature-searching-tools/cadth-covid-19-search-strings/>

Manual searches

In addition to the searches of the electronic databases, manual searches were also conducted to capture data from recent studies not yet published, searches were conducted by searching for: “COVID-19 vaccines OR cost OR economic OR resource use”. The retrieval of unpublished clinical trials and other studies through the search of registries and conference proceedings is recommended in the National Health for Health and Care Excellence (NICE) Guide to the methods of technology appraisals [58]. Manual searches included:

Conference proceedings (published from 2020 onwards) and online information repositories:

NIH COVID database (<https://www.ncbi.nlm.nih.gov/research/coronavirus/>)

International Society for Pharmacoeconomics and Outcomes Research (ISPOR) all meetings

International Health Economics Association (IHEA)

Research Papers in Economics (RePEc) website

Google scholar

Preprint server

MedRxiv <https://www.medrxiv.org/>

Health Technology Assessment (HTA) agencies:

**UK:** National Health for Health and Care Excellence (NICE), Scottish Medicines Consortium (SMC) and All Wales Medicines Strategy Group (AWMSG)

**France:** Haute Autorité de Santé (HAS)

**Germany:** Gemeinsamer Bundesausschuss (GBA) and Institut für Qualität und Wirtschaftlichkeit im Gesundheitswesenis (IQWiG)

**Canada:** Canadian Agency for Drugs and. Technologies in Health (CADTH)

**US:** Institute for Clinical and Economic Review (ICER)

**Australia:** Pharmaceutical Benefits Advisory Committee (PBAC)

**South Korea:** Health Insurance Review and Assessment Service (HIRA)

**Taiwan:** Center of Drug Evaluation (CDE)

**Appendix 2: Inclusion/exclusion criteria**

| Category | Inclusion criteria | Exclusion criteria |
| --- | --- | --- |
| Population | COVID-19 patients  People who are indirectly affected by COVID-19, including populations who are affected by COVID-19 prevention measures, and caregivers/carers | People not having received a COVID-19 diagnosis  People or populations not affected by COVID-19 indirectly |
| Interventions | Strategies for prevention or control of COVID-19  Treatment of COVID-19 | Interventions not for the prevention, control, or treatment of COVID-19 |
| Comparators | No intervention, standard care or any other intervention | - |
| Outcomes | Resource use related to disease and the associated intervention, including but not restricted to hospital admissions, length of stay, physician visits, emergency department/accident and emergency visits and pharmacy costs  Cost (per health state, mean cost per patient, etc.) | No relevant outcomes |
| Study type | Observation studies, SLRs and NMAs | Case studies/reports, RCTs |
| Language | No restrictions | - |
| Publication year | No restrictions | - |

**Appendix 3: Excluded studies**

| # | Citation | Reason |
| --- | --- | --- |
| 1 | Bartsch S. M.;Ferguson M. C.;McKinnell J. A.;O'Shea K. J.;Wedlock P. T.;Siegmund S. S., et al.. The potential health care costs and resource use associated with COVID-19 in the United States | Not study type of interest |
| 2 | Walzer S.;Vollmer L.;Krenberger S.. PIN123 How Much Will the COVID-19 Outbreak Have Cost the German Health Care System in the First Months Since the Outbreak? | Not study type of interest |
| 3 | Schoeneberg C.;Eschbach D. A.;Friess T.;Lendemans S.;Hoefer C.;Ruchholtz S.. Effect of the COVID-19 Pandemic in German Trauma Centres and Geriatric Trauma Centres DGU | Not outcomes of interest |
| 4 | Lloyd P.;Dixon R.. Modelling the Spread of the Coronavirus: A View from Economics | Not outcomes of interest |
| 5 | Babajanyan S. G.;Cheong K. H.. Age-structured SIR model and resource growth dynamics: a COVID-19 study | Not study type of interest |
| 6 | Lai C. C.;Hsu C. Y.;Jen H. H.;Yen A. M.;Chan C. C.;Chen H. H.. The Bayesian Susceptible-Exposed-Infected-Recovered model for the outbreak of COVID-19 on the Diamond Princess Cruise Ship | Not outcomes of interest |
| 7 | Andreata M.;Faraldi M.;Bucci E.;Lombardi G.;Zagra L.. Operating room efficiency and timing during coronavirus disease 2019 outbreak in a referral orthopaedic hospital in Northern Italy | Not outcomes of interest |
| 8 | GutiÃ©rrez-GutiÃ©rrez B.;Del Toro M. D.;Borobia A. M.;Carcas A.;JarrÃ­n I.;Yllescas M., et al.. Identification and validation of clinical phenotypes with prognostic implications in patients admitted to hospital with COVID-19: a multicentre cohort study | Not outcomes of interest |
| 9 | Patt D.;Gordan L.;Diaz M.;Okon T.;Grady L.;Harmison M., et al.. Impact of COVID-19 on cancer care: How the pandemic is delaying cancer diagnosis and treatment for American seniors | Not outcomes of interest |
| 10 | Lassale C.;Hamer M.;HernÃ¡ez Ã;Gale C. R.;Batty G. D.. High density lipoprotein cholesterol and risk of subsequent COVID-19 hospitalisation: the UK Biobank study | Not outcomes of interest |
| 11 | Martei Y. M.;Rick T. J.;Fadelu T.;Ezzi M. S.;Hammad N.;Quadri N. S., et al.. Impact of COVID-19 on cancer care delivery Africa: A cross-sectional survey of oncology providers in Africa | Not population of interest |
| 12 | Rezel-Potts E.;L'Esperance V.;Gullifiord M.. Antimicrobial stewardship during the COVID-19 epidemic: population-based cohort study and interrupted time series analysis in the United Kingdom | Not population of interest |
| 13 | Berlin A.;Lovas M.;Truong T.;Melwani S.;Liu J.;Liu Z. A., et al.. Implementation and Outcomes of Virtual Care across a Tertiary Cancer Center during COVID-19 | Not population of interest |
| 14 | Datta P.;Barrett W.;Bentzinger M.;Jasinski T.;Jayagopal L. A.;Mahoney A., et al.. Ambulatory care for epilepsy via telemedicine during the COVID-19 pandemic | Not population of interest |
| 15 | Singh J.;Green M. B.;Lindblom S.;Reif M. S.;Thakkar N. P.;Papali A.. Telecritical Care Clinical and Operational Strategies in Response to COVID-19 | Not outcomes of interest |
| 16 | He J.;Yang L.;Tao Z.;Yang J.;Zhou Y.;Wang R., et al.. Impact of the 2019 novel coronavirus disease (Covid-19) epidemic on radiotherapy-treated patients with cancer: A single-center descriptive study | Not outcomes of interest |
| 17 | Nowak D.;Ochmann U.;Brandenburg S.;Nienhaus A.;Woltjen M.. COVID-19 as an occupational disease or work-related accident: Considerations regarding insurance cover and reporting obligation in the statutory accident insurance | Not outcomes of interest |
| 18 | Marin-Gomez F. X.;FÃ bregas-Escurriola M.;SeguÃ F. L.;PÃ©rez E. H.;Camps M. B.;PeÃ±a J. M., et al.. Assessing the likelihood of contracting COVID-19 disease based on a predictive tree model: A retrospective cohort study | Not outcomes of interest |
| 19 | Adam E. H.;Flinspach A. N.;Jankovic R.;De Hert S.;Zacharowski K.. Treating patients across European Union borders: An international survey in light of the coronavirus disease-19 pandemic | Not outcomes of interest |
| 20 | Nairz M.;Bellmann-Weiler R.;LadstÃ¤tter M.;SchÃ¼llner F.;Zimmermann M.;Koller A. M., et al.. Overcoming limitations in the availability of swabs systems used for SARS-CoV-2 laboratory diagnostics | Not outcomes of interest |
| 21 | Purtle J.;Joshi R.;LÃŠ-Scherban F.;Henson R. M.;Diez Roux A. V.. Linking Data on Constituent Health with Elected Officials' Opinions: Associations Between Urban Health Disparities and Mayoral Officials' Beliefs About Health Disparities in Their Cities | Not outcomes of interest |
| 22 | Briggs D. C.;Numbere T. W.. Covid-19 and the Nigerian child: The time to act is now | Not study type of interest |
| 23 | Dunleavy L.;Preston N.;Bajwah S.;Bradshaw A.;Cripps R.;Fraser L. K., et al.. 'Necessity is the mother of invention': Specialist palliative care service innovation and practice change in response to COVID-19. Results from a multinational survey (CovPall) | Not population of interest |
| 24 | Faiva E.;Hashim H. T.;Ramadhan M. A.;Musa S. K.;Bchara J.;Tuama Y. D., et al.. Drug supply shortage in Nigeria during COVID-19: efforts and challenges | Not outcomes of interest |
| 25 | Jarolimova J.;Bunda B.;Govere S.;Wara N.;Bogart L.;Thulare H., et al.. Experiences of participants in a decentralized HIV medication distribution program in South Africa during the COVID-19 pandemic | Not outcomes of interest |
| 26 | Gomez-Roas M.;Davis K. D.;Leziak K.;Jackson J.;Williams B. R.;Feinglass J. M., et al.. 227 Postpartum during a pandemic: challenges of low-income women with healthcare interactions during COVID-19 | Not outcomes of interest |
| 27 | Aran D.;Beachler D. C.;Lanes S.;Overhage J. M.. Prior presumed coronavirus infection reduces COVID-19 risk: A cohort study | Not outcomes of interest |
| 28 | Specificity testing by point prevalence as a simple assessment strategy using the Roche ElecsysÃ‚Â® anti-SARS-CoV-2 immunoassay | Not outcomes of interest |
| 29 | Hemalatha M.;Kiran U.;Kuncha S. K.;Kopperi H.;Gokulan C. G.;Mohan S. V., et al.. Surveillance of SARS-CoV-2 spread using wastewater-based epidemiology: Comprehensive study | Not outcomes of interest |
| 30 | Yacouba A.;LagarÃ© A.;Maiga D. A.;Sambo H. M.;Ousmane S.;Harouna Z. H., et al.. Laboratory organisation and management of SARS-CoV-2 infection in Niger, West Africa | Not outcomes of interest |
| 31 | Chia W. Y.;Kok H.;Chew K. W.;Low S. S.;Show P. L.. Can algae contribute to the war with Covid-19? | Not study type of interest |
| 32 | Singh A.;Mountjoy N.;McElroy D.;Coffee N.;Mittal S.. Patient satisfaction with telehealth in cardiology: Lessons and caution from the response to COVID-19 restrictions | Not population of interest |
| 33 | Kharofa R.;Anthony C.;Stackpole K.;Siegel R.;Moorhead R.. Pediatric weight management amid the covid 19 pandemic: A natural experiment | Not outcomes of interest |
| 34 | Hruschak V.;Flowers K. M.;Azizoddin D. R.;Jamison R. N.;Edwards R. R.;Schreiber K. L.. Cross-sectional study of psychosocial and pain-related variables among patients with chronic pain during a time of social distancing imposed by the coronavirus disease 2019 pandemic | Not population of interest |
| 35 | Khunti K.;Knighton P.;Zaccardi F.;Bakhai C.;Barron E.;Holman N., et al.. Prescription of glucose-lowering therapies and risk of COVID-19 mortality in people with type 2 diabetes: a nationwide observational study in England | Not outcomes of interest |
| 36 | Ntambara J.;Chu M.. The risk to child nutrition during and after COVID-19 pandemic: what to expect and how to respond | Not outcomes of interest |
| 37 | Debroy P.;Lupo S.;Reimer-McAtee M.;Gioia J. E.;Lake J. E.. Attitudes toward COVID-19 among people living with HIV attending a multiethnic outpatient centre in Houston, Texas | Not population of interest |
| 38 | Chattu V. K.;Knight W. A.;Adisesh A.;Yaya S.;Reddy K. S.;Di Ruggiero E., et al.. Politics of disease control in Africa and the critical role of global health diplomacy: A systematic review | Not outcomes of interest |
| 39 | Borges-Machado F.;Barros D.;Ribeiro Ã“;Carvalho J.. The Effects of COVID-19 Home Confinement in Dementia Care: Physical and Cognitive Decline, Severe Neuropsychiatric Symptoms and Increased Caregiving Burden | Not outcomes of interest |
| 40 | Devpura N.. Effect of COVID-19 on the relationship between Euro/USD exchange rate and oil price | Not outcomes of interest |
| 41 | Robledo C.;Machiorlatti M.;Clark L.;Morrow J.. COVID-19 Impact on Health & Well-Being Survey: Measuring Depression and Anxiety Among Individuals Sheltering at Home | Not outcomes of interest |
| 42 | Wang L.;Xu C.;Wang J.;Qiao J.;Yan M.;Zhu Q.. Spatiotemporal heterogeneity and its determinants of COVID-19 transmission in typical labor export provinces of China | Not outcomes of interest |
| 43 | Manchikanti L.;Vanaparthy R.;Atluri S.;Sachdeva H.;Kaye A. D.;Hirsch J. A.. COVID-19 and the Opioid Epidemic: Two Public Health Emergencies That Intersect With Chronic Pain | Not outcomes of interest |
| 44 | COVID-19 severity is tripled in the diabetes community: A prospective analysis of the pandemicÃ¢â‚¬â„¢s impact in type 1 and type 2 diabetes | Not outcomes of interest |
| 45 | Fry H. L.;Levin O.;Kholina K.;Bianco J. L.;Gallant J.;Chan K., et al.. Infant feeding experiences and concerns among caregivers early in the COVID-19 State of Emergency in Nova Scotia, Canada | Not outcomes of interest |
| 46 | Adikari A.;Nawaratne R.;De Silva D.;Ranasinghe S.;Alahakoon O.;Alahakoon D.. Emotions of COVID-19: A Study of Self-Reported Information and Emotions during the COVID-19 Pandemic using Artificial Intelligence | Not outcomes of interest |
| 47 | Lindinger-Sternart S.;Kaur V.;Widyaningsih Y.;Patel A. K.. COVID-19 phobia across the world: Impact of resilience on COVID-19 phobia in different nations | Not outcomes of interest |
| 48 | Alkhresheh M. M.. Semiological discourse analysis of the editorial cartoons of international newspapers on covid-19 | Not outcomes of interest |
| 49 | Current state of trauma and violence in SÃƒÂ£o Paulo - Brazil during the COVID-19 pandemic | Not outcomes of interest |
| 50 | Mukhra R.;Krishan K.;Kanchan T.. Agony of the laborers and daily wagers during the COVID-19 induced lockdown in India | Not outcomes of interest |
| 51 | Alomar R. S.;Alshamlan N. A.;Alamer N. A.;Aldulijan F.;Almuhaidib S.;Almukhadhib O., et al.. What are the barriers and facilitators of volunteering among healthcare students during the COVID-19 pandemic? A Saudi-based cross-sectional study | Not population of interest |
| 52 | Sayeed A.;Rahman M. H.;Bundschuh J.;Herath I.;Ahmed F.;Bhattacharya P., et al.. Handwashing with soap: A concern for overuse of water amidst the COVID-19 pandemic in Bangladesh | Not outcomes of interest |
| 53 | Wang S.;Green H. C.;Wilder M. L.;Du Q.;Kmush B. L.;Collins M. B., et al.. High-throughput wastewater analysis for substance use assessment in central New York during the COVID-19 pandemic | Not outcomes of interest |
| 54 | Bisne V. V.. Increased demand of emergency medical services in covid-19 | Not outcomes of interest |
| 55 | Olding M.;Barker A.;McNeil R.;Boyd J.. Essential work, precarious labour: The need for safer and equitable harm reduction work in the era of COVID-19 | Not outcomes of interest |
| 56 | Naik D.;Giri M.;Nagarajappa R.;Mahapatra I.;Dhar U.. Covid 19 pandemic: Challenges in healthcare system of india | Not outcomes of interest |
| 57 | Rodriguez J. A.;Betancourt J. R.;Sequist T. D.;Ganguli I.. Differences in the use of telephone and video telemedicine visits during the COVID-19 pandemic | Not outcomes of interest |
| 58 | Tse K. Y.;Domingo E. J.;Konar H.;Kumarasamy S.;Pariyar J.;Tjokroprawiro B. A., et al.. COVID-19 and gynecological cancers: Asia and Oceania Federation of Obstetrics and Gynecology oncology committee opinion | Not intervention of interest |
| 59 | Belhadi A.;Kamble S.;Jabbour C. J. C.;Gunasekaran A.;Ndubisi N. O.;Venkatesh M.. Manufacturing and service supply chain resilience to the COVID-19 outbreak: Lessons learned from the automobile and airline industries | Not population of interest |
| 60 | Rangon C. M.;Krantic S.;Moyse E.;FougÃ¨re B.. The Vagal Autonomic Pathway of COVID-19 at the Crossroad of Alzheimer's Disease and Aging: A Review of Knowledge | Not outcomes of interest |
| 61 | Wilkinson E.;Jetty A.;Petterson S.;Jabbarpour Y.;Westfall J. M.. Primary Care's Historic Role in Vaccination and Potential Role in COVID-19 Immunization Programs | Not outcomes of interest |
| 62 | Pati S.;Mahapatra P.;Kanungo S.;Uddin A.;Sahoo K. C.. Managing Multimorbidity (Multiple Chronic Diseases) Amid COVID-19 Pandemic: A Community Based Study From Odisha, India | Not outcomes of interest |
| 63 | Islam M. S.;Ferdous M. Z.;Islam U. S.;Mosaddek A. S. M.;Potenza M. N.;Pardhan S.. Treatment, persistent symptoms, and depression in people infected with covid-19 in bangladesh | Not outcomes of interest |
| 64 | Mohammadpour M.;Zarifinezhad E.;Ghanbarzadegan A.;Naderimanesh K.;Shaarbafchizadeh N.;Bastani P.. Main factors affecting the readiness and responsiveness of healthcare systems during epidemic crises: A scoping review on cases of sars, mers, and covid-19 | Not outcomes of interest |
| 65 | Haque M.;Kumar S.;Charan J.;Bhatt R.;Islam S.;Dutta S., et al.. Utilisation, Availability and Price Changes of Medicines and Protection Equipment for COVID-19 Among Selected Regions in India: Findings and Implications | Not intervention of interest |
| 66 | Gad M.;Kazibwe J.;Quirk E.;Gheorghe A.;Homan Z.;Bricknell M.. Civil-military cooperation in the early response to the COVID-19 pandemic in six European countries | Not outcomes of interest |
| 67 | Malykhina I. O.;Riapuhina V. N.;Chizhova E. N.;Rozdolskaya I. V.. Neo-industrialization as the bases of the innovative trajectory of the development of Russian industry before and during the coronavirus disease-19 pandemic | Not outcomes of interest |
| 68 | Collins C. D.;Huang J.;Potoski B. A.. Open-source institutional guideline recommendations during the COVID-19 pandemic | Not outcomes of interest |
| 69 | Kameda K.;Barbeitas M. M.;Caetano R.;LÃ¶wy I.;Oliveira A. C. D.;CorrÃªa Mcdv, et al.. Testing COVID-19 in Brazil: fragmented efforts and challenges to expand diagnostic capacity at the Brazilian Unified National Health System | Not outcomes of interest |
| 70 | Filimonau V.. The prospects of waste management in the hospitality sector post COVID-19 | Not outcomes of interest |
| 71 | The Arab regionÃ¢â‚¬â„¢s contribution to global COVID-19 research: Bibliometric and visualization analysis | Not outcomes of interest |
| 72 | Dharmaraj S.;Ashokkumar V.;Hariharan S.;Manibharathi A.;Show P. L.;Chong C. T., et al.. The COVID-19 pandemic face mask waste: A blooming threat to the marine environment | Not outcomes of interest |
| 73 | Adeyinka A.;Bailey K.;Pierre L.;Kondamudi N.. COVID 19 infection: Pediatric perspectives | Not outcomes of interest |
| 74 | Cristea M.;Noja G. G.;JurcuÅ£ C. N.;Ponea C. Åž;Caragiani E. S.;Istodor A. V.. The interplay between public health, well-being and population aging in europe: An advanced structural equation modelling and gaussian network approach | Not population of interest |
| 75 | Li Z.;Guan X.;Mao N.;Luo H.;Qin Y.;He N., et al.. Antibody seroprevalence in the epicenter Wuhan, Hubei, and six selected provinces after containment of the first epidemic wave of COVID-19 in China | Not outcomes of interest |
| 76 | Javaid M.;Khan I. H.. Internet of Things (IoT) enabled healthcare helps to take the challenges of COVID-19 Pandemic | Not outcomes of interest |
| 77 | Boum Y.;Fai K. N.;Nicolay B.;Mboringong A. B.;Bebell L. M.;Ndifon M., et al.. Performance and operational feasibility of antigen and antibody rapid diagnostic tests for COVID-19 in symptomatic and asymptomatic patients in Cameroon: a clinical, prospective, diagnostic accuracy study | Not outcomes of interest |
| 78 | Koysombat K.;Plonczak A. M.;West C. A.. The role of teleconsultation in the management of suspected skin malignancy in plastic surgery during COVID-19 outbreak: A single centre experience | Not population of interest |
| 79 | AlKhaldi M.;James N.;Chattu V. K.;Ahmed S.;Meghari H.;Kaiser K., et al.. Rethinking and strengthening the Global Health Diplomacy through triangulated nexus between policy makers, scientists and the community in light of COVID-19 global crisis | Not outcomes of interest |
| 80 | Rahimi N. R.;Fouladi-Fard R.;Aali R.;Shahryari A.;Rezaali M.;Ghafouri Y., et al.. Bidirectional association between COVID-19 and the environment: A systematic review | Not outcomes of interest |
| 81 | Yilmaz FerhatoÄŸlu S.;Yurtseven N.. Analysis of articles on COVID-19: Is scientific productivity parallel to case rates across countries? | Not outcomes of interest |
| 82 | Zhu W.;Yang J.;Lv H.;Zhuang M.. Pandemic Uncertainty and Socially Responsible Investments | Not outcomes of interest |
| 83 | McClure T.;Davis J.;Garcia M.;Eddy K. R.;Palanee-Phillips T.;Bam B., et al.. Implementing a rapid response to the COVID-19 global pandemic in MTN-034/REACH: An HIV prevention trial among adolescent girls and young women in Africa | Not study type of interest |
| 84 | Lima M. C.;Sander M.;dos Santos Lunardi M.;Ribeiro L. C.;Rieger D. K.;Lin K., et al.. Challenges in telemedicine for adult patients with drug-resistant epilepsy undergoing ketogenic diet treatment during the COVID-19 pandemic in the public healthcare system in Brazil | Not population of interest |
| 85 | Shivangi;Meena L. S.. A comprehensive review of COVID-19 in India: A frequent catch of the information | Not outcomes of interest |
| 86 | Wilke N. G.;Howard A. H.;Goldman P.. Rapid return of children in residential care to family as a result of COVID-19: Scope, challenges, and recommendations | Not outcomes of interest |
| 87 | Ming Z.;Han S.;Deng K.;Reyes E.;Ha Y.;Kim S., et al.. Prevalence of SARS-CoV-2 Contamination on Food Plant Surfaces as Determined by Environmental Monitoring | Not outcomes of interest |
| 88 | Aquanno S. M.;Bryant T.. Situating the Pandemic: Welfare Capitalism and Canada's Liberal Regime | Not outcomes of interest |
| 89 | Lurie N.;Keusch G. T.;Dzau V. J.. Urgent lessons from COVID 19: why the world needs a standing, coordinated system and sustainable financing for global research and development | Not outcomes of interest |
| 90 | Narithi Maharani A. A. S.;Supriyadinatha Gorda A. A. N. E.. Investigating community decisions in online medicines purchasing | Not outcomes of interest |
| 91 | Hejaz H. A.. Palestinian strategies, guidelines, and challenges in the treatment and management of coronavirus disease-2019 (COVID-19) | Not outcomes of interest |
| 92 | Campagnano S.;Angelini F.;Fonsi G. B.;Novelli S.;Drudi F. M.. Diagnostic imaging in COVID-19 pneumonia: a literature review | Not outcomes of interest |
| 93 | Selva G. S.;Chandran R. K.;Lambodaran G.;Manodh P.. Covid-19: Current status and future strategies to control the spread in the state of tamil nadu, india | Not outcomes of interest |
| 94 | Su G.;Ong H. C.;Ibrahim S.;Fattah I. M. R.;Mofijur M.;Chong C. T.. Valorisation of medical waste through pyrolysis for a cleaner environment: Progress and challenges | Not outcomes of interest |

**Appendix 4: List of inc****luded studies in the SLR**

| Individual studies |
| --- |
| 1.Nurchis MC, Pascucci D, Sapienza M, Villani L, D'Ambrosio F, Castrini F, Specchia ML, Laurenti P, Damiani G. Impact of the Burden of COVID-19 in Italy: Results of Disability-Adjusted Life Years (DALYs) and Productivity Loss. Int J Environ Res Public Health. 2020 Jun 13;17(12):4233. doi: 10.3390/ijerph17124233. PMID: 32545827; PMCID: PMC7345321.  2.Salje H, Tran Kiem C, Lefrancq N, Courtejoie N, Bosetti P, Paireau J, Andronico A, Hozé N, Richet J, Dubost CL, Le Strat Y, Lessler J, Levy-Bruhl D, Fontanet A, Opatowski L, Boelle PY, Cauchemez S. Estimating the burden of SARS-CoV-2 in France. Science. 2020 Jul 10;369(6500):208-211. doi: 10.1126/science.abc3517. Epub 2020 May 13. Erratum in: Science. 2020 Jun 26;368(6498): PMID: 32404476; PMCID: PMC7223792.  3.Anderson MR, Bach PB, Baldwin MR. Hospital Length of Stay for Patients with Severe COVID-19: Implications for Remdesivir's Value. Pharmacoecon Open. 2021 Mar;5(1):129-131. doi: 10.1007/s41669-020-00243-6. Epub 2020 Dec 14. PMID: 33315210; PMCID: PMC7734451.  4.Athanasakis K, Nomikos N, Souliotis K, Kyriopoulos J. PNS21 From Disease Burden to Healthcare Cost: Highlighting the Health Economics Aspects of the COVID-19 Pandemic. Value Health. 2020;23:S647. doi:10.1016/j.jval.2020.08.1465  5.Bartsch SM, Ferguson MC, McKinnell JA, O'Shea KJ, Wedlock PT, Siegmund SS, Lee BY. The Potential Health Care Costs And Resource Use Associated With COVID-19 In The United States. Health Aff (Millwood). 2020 Jun;39(6):927-935. doi: 10.1377/hlthaff.2020.00426. Epub 2020 Apr 23. PMID: 32324428.  6.Birch S. Modelling the economic impact of COVID19 under different policy choices: Mitigation versus suppression when time is a scarce resource. SSM Popul Health. 2020 Dec;12:100667. doi: 10.1016/j.ssmph.2020.100667. Epub 2020 Oct 14. PMID: 33072840; PMCID: PMC7553863.  7.Busch J, Reis Neto JP. PIN170 The NOVEL Coronavirus Disease (COVID-19): Impacts on TESTS and Hospitalizations Performance in a Health PLAN in Brazil. Value Health. 2020;23:S572. doi:10.1016/j.jval.2020.08.1011  8.Davies NG, Barnard RC, Jarvis CI, Russell TW, Semple MG, Jit M, Edmunds WJ; Centre for Mathematical Modelling of Infectious Diseases COVID-19 Working Group; ISARIC4C investigators. Association of tiered restrictions and a second lockdown with COVID-19 deaths and hospital admissions in England: a modelling study. Lancet Infect Dis. 2021 Apr;21(4):482-492. doi: 10.1016/S1473-3099(20)30984-1. Epub 2020 Dec 24. PMID: 33357518; PMCID: PMC7758181.  9.Gedik, Habip. "THE COST ANALYSIS OF INPATIENTS WITH COVID-19." Acta Medica 36 (2020): 3289.  10.Hamer, Mark, et al. "Overweight, obesity, and risk of hospitalization for COVID-19: A community-based cohort study of adults in the United Kingdom." Proceedings of the National Academy of Sciences 117.35 (2020): 21011-21013.  11.Hashmi P, Fahad S, Naqi Khan H, Zahid M, Sadruddin A, Noordin S. Covid-19 pandemic: Economic burden on patients with musculoskeletal injuries in a tertiary care hospital of LMIC; retrospective cross sectional study. Ann Med Surg (Lond). 2020 Dec;60:5-8. doi: 10.1016/j.amsu.2020.09.049. Epub 2020 Oct 12. PMID: 33072312; PMCID: PMC7550110.  12.Heppner Z, Shreffler J, Polites A, Ross A, Thomas JJ, Huecker M. COVID-19 and emergency department volume: The patients return but have different characteristics [published online ahead of print, 2020 Sep 10]. Am J Emerg Med. 2020;S0735-6757(20)30803-2. doi:10.1016/j.ajem.2020.09.009  13.Nourazari S, Davis SR, Granovsky R, et al. Decreased hospital admissions through emergency departments during the COVID-19 pandemic. Am J Emerg Med. 2021;42:203-210. doi:10.1016/j.ajem.2020.11.029  14.Price-Haywood, Eboni G., et al. "Hospitalization and mortality among black patients and white patients with Covid-19." New England Journal of Medicine 382.26 (2020): 2534-2543.  15.Shin JH, Takada D, Morishita T, Lin H, Bun S, Teraoka E, Okuno T, Itoshima H, Nagano H, Kishimoto K, Segawa H, Asami Y, Higuchi T, Minato K, Kunisawa S, Imanaka Y. Economic impact of the first wave of the COVID-19 pandemic on acute care hospitals in Japan. PLoS One. 2020 Dec 31;15(12):e0244852. doi: 10.1371/journal.pone.0244852. PMID: 33382838; PMCID: PMC7775082.  16.Holy C, Shah S, Elangovanraaj N, et al. PIN17 Healthcare Resource Utilization and Cost in Patients with Inpatient Mortality Due to COVID-19 Infection. Value Health. 2020;23:S546. doi:10.1016/j.jval.2020.08.858  17.Jackson, Michael L. "Low-impact social distancing interventions to mitigate local epidemics of SARS-CoV-2." Microbes and Infection 22.10 (2020): 611-616.  18.Karagiannidis C, Mostert C, Hentschker C, Voshaar T, Malzahn J, Schillinger G, Klauber J, Janssens U, Marx G, Weber-Carstens S, Kluge S, Pfeifer M, Grabenhenrich L, Welte T, Busse R. Case characteristics, resource use, and outcomes of 10 021 patients with COVID-19 admitted to 920 German hospitals: an observational study. Lancet Respir Med. 2020 Sep;8(9):853-862. doi: 10.1016/S2213-2600(20)30316-7. Epub 2020 Jul 28. PMID: 32735842; PMCID: PMC7386882.  19.Karahan EB, Öztopçu S, Kurnaz M, et al. PIN56 Cost of COVID-19 Patients Treatment in Turkey. Value Health. 2020;23:S554. doi:10.1016/j.jval.2020.08.897  20.Keogh-Brown, Marcus R., et al. "The impact of Covid-19, associated behaviours and policies on the UK economy: A computable general equilibrium model." SSM-population health 12 (2020): 100651.  21.Khan AA, AlRuthia Y, Balkhi B, et al. Survival and Estimation of Direct Medical Costs of Hospitalized COVID-19 Patients in the Kingdom of Saudi Arabia [published correction appears in Int J Environ Res Public Health. 2020 Dec 17;17(24):]. Int J Environ Res Public Health. 2020;17(20):7458. Published 2020 Oct 13. doi:10.3390/ijerph17207458  22.Li, Xue-Zheng, et al. "Treatment of coronavirus disease 2019 in Shandong, China: a cost and affordability analysis." Infectious diseases of poverty 9.1 (2020): 1-8.  23.Loerinc LB, Scheel AM, Evans ST, Shabto JM, O'Keefe GA, O'Keefe JB. Discharge characteristics and care transitions of hospitalized patients with COVID-19. Healthc (Amst). 2021 Mar;9(1):100512. doi: 10.1016/j.hjdsi.2020.100512. Epub 2020 Dec 24. PMID: 33383393; PMCID: PMC7836258.  24.Vaughn VM, Gandhi TN, Petty LA, Patel PK, Prescott HC, Malani AN, Ratz D, McLaughlin E, Chopra V, Flanders SA. Empiric Antibacterial Therapy and Community-onset Bacterial Coinfection in Patients Hospitalized With Coronavirus Disease 2019 (COVID-19): A Multi-hospital Cohort Study. Clin Infect Dis. 2021 May 18;72(10):e533-e541. doi: 10.1093/cid/ciaa1239. PMID: 32820807; PMCID: PMC7499526.  25.Viscusi WK. Pricing the global health risks of the COVID-19 pandemic. J Risk Uncertain. 2020 Nov 2:1-28. doi: 10.1007/s11166-020-09337-2. Epub ahead of print. PMID: 33162671; PMCID: PMC7604649.  26.Oluyase AO, Hocaoglu M, Cripps RL, Maddocks M, Walshe C, Fraser LK, Preston N, Dunleavy L, Bradshaw A, Murtagh FEM, Bajwah S, Sleeman KE, Higginson IJ; CovPall study team. The Challenges of Caring for People Dying From COVID-19: A Multinational, Observational Study (CovPall). J Pain Symptom Manage. 2021 Feb 5:S0885-3924(21)00159-7. doi: 10.1016/j.jpainsymman.2021.01.138. Epub ahead of print. PMID: 33556496; PMCID: PMC7863772.  27.Pardhan S, Drydakis N. Associating the Change in New COVID-19 Cases to GDP per Capita in 38 European Countries in the First Wave of the Pandemic. Front Public Health. 2021 Jan 20;8:582140. doi: 10.3389/fpubh.2020.582140. PMID: 33553086; PMCID: PMC7854531.  28.Zhu N, Aylin P, Rawson T, Gilchrist M, Majeed A, Holmes A. Investigating the impact of COVID-19 on primary care antibiotic prescribing in North West London across two epidemic waves. Clin Microbiol Infect. 2021 Feb 16;27(5):762–8. doi: 10.1016/j.cmi.2021.02.007. Epub ahead of print. PMID: 33601010; PMCID: PMC7884225.  29.Wang J, Lyu Y, Zhang H, Jing R, Lai X, Feng H, Knoll MD, Fang H. Willingness to pay and financing preferences for COVID-19 vaccination in China. Vaccine. 2021 Apr 1;39(14):1968-1976. doi: 10.1016/j.vaccine.2021.02.060. Epub 2021 Feb 27. PMID: 33714653; PMCID: PMC7914003.  30.Falah Hasan H. Legal and Health Response to COVID-19 in the Arab Countries. Risk Manag Healthc Policy. 2021;14:1141-1154. Published 2021 Mar 16. doi:10.2147/RMHP.S297565  31.Pham, Anh Viet, et al. "State-level COVID-19 outbreak and stock returns." Finance Research Letters (2021): 102002.  32.Ghaffari Darab M, Keshavarz K, Sadeghi E, Shahmohamadi J, Kavosi Z. The economic burden of coronavirus disease 2019 (COVID-19): evidence from Iran. BMC Health Serv Res. 2021 Feb 11;21(1):132. doi: 10.1186/s12913-021-06126-8. PMID: 33573650; PMCID: PMC7877330.  33.Di Fusco M, Shea KM, Lin J, Nguyen JL, Angulo FJ, Benigno M, Malhotra D, Emir B, Sung AH, Hammond JL, Stoychev S, Charos A. Health outcomes and economic burden of hospitalized COVID-19 patients in the United States. J Med Econ. 2021 Jan-Dec;24(1):308-317. doi: 10.1080/13696998.2021.1886109. PMID: 33555956.  34.Gandjour A. How Many Intensive Care Beds are Justifiable for Hospital Pandemic Preparedness? A Cost-effectiveness Analysis for COVID-19 in Germany. Appl Health Econ Health Policy. 2021 Mar;19(2):181-190. doi: 10.1007/s40258-020-00632-2. Epub 2021 Jan 12. PMID: 33433853; PMCID: PMC7801567.  35.Dabestani A, DeAngelo D, Chhay SR, Larson BJ, Ganio MC. Medication utilization in patients in New York hospitals during the COVID-19 pandemic. Am J Health Syst Pharm. 2020 Oct 30;77(22):1885-1892. doi: 10.1093/ajhp/zxaa251. PMID: 32712675; PMCID: PMC7454318. |
| Included published SLRs |
| 1. Mackey, K., Ayers, C. K., Kondo, K. K., Saha, S., Advani, S. M., Young, S., Spencer, H., Rusek, M., Anderson, J., Veazie, S., Smith, M., Kansagara, D.; Racial and Ethnic Disparities in COVID-19-Related Infections, Hospitalizations, and Deaths : A Systematic Review; 2020  2. Patel, U., Malik, P., Usman, M. S., Mehta, D., Sharma, A., Malik, F. A., Khan, N., Siddiqi, T. J., Ahmed, J., Patel, A., Sacks, H.; Age-Adjusted Risk Factors Associated with Mortality and Mechanical Ventilation Utilization Amongst COVID-19 Hospitalizations—a Systematic Review and Meta-Analysis; 2020 |
| Included studies from the published SLRs |
| 1. J. Zhao, H. Jin, X. Li, J. Jia, C. Zhang, H. Zhao, et al., Disease burden attributable to the first wave of COVID-19 in China, and the effect of timing on the costeffectiveness of movement restriction policies, Available at: SSRN: https://ssrncom/abstract=3605199. 2020  2. Centers for Disease Control and Prevention. COVIDView. Key updates for week 43, ending October 24, 2020. Accessed at www.cdc.gov/coronavirus/2019-ncov/covid-data/pdf/covidview-10-30  -2020.pdf on 2 November 2020.  3. Centers for Disease Control and Prevention, National Center for Health Statistics. Health disparities: race and Hispanic origin. Accessed at www.cdc.gov/nchs/nvss/vsrr/covid19/health_disparities.htm on 2 November 2020.  4. APM Research Lab 2020. Color of coronavirus. American Public Media. Accessed at www.apmresearchlab.org/covid/deaths-by-race#reporting on 2 November 2020.  5. . Adegunsoye A, Ventura IB, Liarski VM. Association of black race with outcomes in COVID-19 disease: a retrospective cohort study [Letter]. Ann Am Thorac Soc. 2020;17:1336-1339. [PMID:32643398] doi:10.1513/AnnalsATS.202006-583RL  6. Azar KMJ, Shen Z, Romanelli RJ, et al. Disparities in outcomes among COVID-19 patients in a large health care system in California. Health Aff (Millwood). 2020;39:1253-62. [PMID: 32437224] doi:10.1377/hlthaff.2020.00598  7. Ebinger JE, Achamallah N, Ji H, et al. Pre-existing traits associated with Covid-19 illness severity. PLoS One. 2020;15:e0236240. [PMID: 32702044] doi:10.1371/journal.pone.0236240  8. Golestaneh L, Neugarten J, Fisher M, et al. The association of race and COVID-19 mortality. EClinicalMedicine. 2020;25:100455. [PMID: 32838233] doi:10.1016/j.eclinm.2020.100455  9. Gu T, Mack JA, Salvatore M, et al. Characteristics associated with Racial/Ethnic disparities in COVID-19 outcomes in an academic health care system. JAMA Netw Open. 2020;3:e2025197. [PMID:33084902] doi:10.1001/jamanetworkopen.2020.25197  10. Killerby ME, Link-Gelles R, Haight SC, et al; CDC COVID-19 Response Clinical Team. Characteristics associated with hospitalization among patients with COVID-19 - metropolitan Atlanta, Georgia, March-April 2020. MMWR Morb Mortal Wkly Rep. 2020;69:790-4. [PMID: 32584797] doi:10.15585/mmwr.mm6925e1  11. Kim L, Garg S, O’Halloran A, et al. Risk factors for intensive care unit admission and in-hospital mortality among hospitalized adults identified through the U.S. coronavirus disease 2019 (COVID-19)- associated hospitalization surveillance network (COVID-NET). Clin Infect Dis. 2020. [PMID: 32674114] doi:10.1093/cid/ciaa1012  12. Lara OD, O’Cearbhaill RE, Smith MJ, et al. COVID-19 outcomes of patients with gynecologic cancer in New York City. Cancer. 2020. [PMID: 32729142] doi:10.1002/cncr.33084  13. McCarty TR, Hathorn KE, Redd WD, et al. How do presenting symptoms and outcomes differ by race/ethnicity among hospitalized patients with COVID-19 infection? Experience in Massachusetts. Clin Infect Dis. 2020. [PMID: 32827436] doi:10.1093/cid/ciaa1245  14. Petrilli CM, Jones SA, Yang J, et al. Factors associated with hospital admission and critical illness among 5279 people with coronavirus disease 2019 in New York City: prospective cohort study. BMJ. 2020;369:m1966. [PMID: 32444366] doi:10.1136/bmj.m1966  15. Rentsch CT, Kidwai-Khan F, Tate JP, et al. Covid-19 testing, hospital admission, and intensive care among 2,026,227 United States veterans aged 54-75 years. med. Rxiv. 2020. [PMID:32511595] doi:10.1101/2020.04.09.20059964  16. Rentsch CT, Kidwai-Khan F, Tate JP, et al. Covid-19 by race and ethnicity: a national cohort study of 6 million United States veterans. med. Rxiv. 2020. [PMID: 32511524] doi:10.1101/2020.05.12.20099135  17. Salacup G, Lo KB, Gul F, et al. Characteristics and clinical outcomes of COVID-19 patients in an underserved-inner city population: a single tertiary center cohort. J Med Virol. 2020. [PMID:32617986] doi:10.1002/jmv.26252  18. Shah P, Owens J, Franklin J, et al. Demographics, comorbidities and outcomes in hospitalized Covid-19 patients in rural southwest Georgia. Ann Med. 2020;52:354-60. [PMID: 32620056] doi:10.1080/07853890.2020.1791356  19. van Gerwen M, Alsen M, Little C, et al. Risk factors and outcomes of COVID-19 in New York City; a retrospective cohort study. J Med Virol. 2020. [PMID: 32706392] doi:10.1002/jmv.26337  20. Wang Z, Zheutlin AB, Kao YH, et al. Analysis of hospitalized COVID-19 patients in the Mount Sinai Health System using  electronic medical records (EMR) reveals important prognostic factors for improved clinical outcomes. medRxiv. Preprint posted online 4 May 2020. doi:10.1101/2020.04.28.20075788  21. Yehia BR, Winegar A, Fogel R, et al. Association of race with mortality among patients hospitalized with coronavirus disease 2019 (COVID-19) at 92 US hospitals. JAMA Netw Open. 2020;3:e2018039 [PMID: 32809033] doi:10.1001/jamanetworkopen.2020.18039  22. Huang C, Wang Y, Li X, Ren L, Zhao J, Hu Y, et al. Clinical features of patients infected with 2019 novel coronavirus in  Wuhan, China. Lancet. 2020;395(10223):497–506. <https://doi.org/10.1016/s0140-6736(20)30183-5>.  23. Guan W-j, Liang W-h, Zhao Y, Liang H-r, Chen Z-s, Li Y-m, et al. Comorbidity and its impact on 1590 patients with COVID-19 in China: a nationwide analysis. Eur Respir J. 2020;55(5):2000547. <https://doi.org/10.1183/13993003.00547-2020>.  24. Wang D, Hu B, Hu C, Zhu F, Liu X, Zhang J, et al. Clinical characteristics of 138 hospitalized patients with 2019 novel  coronavirus–infected pneumonia in Wuhan, China. JAMA. 2020;323(11):1061–9. <https://doi.org/10.1001/jama.2020.1585>  25. Xu XW, Wu XX, Jiang XG, Xu KJ, Ying LJ, Ma CL, et al. Clinical findings in a group of patients infected with the 2019 novel coronavirus (SARS-Cov-2) outside of Wuhan, China: retrospective case series. BMJ. 2020;368:m606. <https://doi.org/10.1136/bmj.m606>.  26. Chen N, Zhou M, Dong X, Qu J, Gong F, Han Y, et al. Epidemiological and clinical characteristics of 99 cases of 2019  novel coronavirus pneumonia in Wuhan, China: a descriptive study. Lancet. 2020;395(10223):507–13. <https://doi.org/10.1016/s0140-6736(20)30211-7>  27. Yang X, Yu Y, Xu J, Shu H, Ja X, Liu H, et al. Clinical course and outcomes of critically ill patients with SARS-CoV-2 pneumonia in Wuhan, China: a single-centered, retrospective, observational study. Lancet Respir Med. 2020;8(5):475–81. https://doi.org/10.1016/S2213-2600(20)30079-5.  28. Zhou F, Yu T, Du R, Fan G, Liu Y, Liu Z, et al. Clinical course and risk factors for mortality of adult inpatients with COVID-19 in Wuhan, China: a retrospective cohort study. Lancet. 2020;395(10229):1054–62. https://doi.org/10.1016/S0140-  6736(20)30566-3.  29. Richardson S, Hirsch JS, Narasimhan M, Crawford JM, McGinn T, Davidson KW, et al. Presenting characteristics, comorbidities, and outcomes among 5700 patients hospitalized with COVID-19 in the New York City area. JAMA. 2020;323(20):2052–9. https://doi.org/10.1001/jama.2020.6775.  30. Goyal P, Choi JJ, Pinheiro LC, Schenck EJ, Chen R, Jabri A, et al. Clinical characteristics of Covid-19 in New York City. N Engl J Med. 2020;382:2372–4. <https://doi.org/10.1056/NEJMc2010419>  31. Ruan Q, Yang K, Wang W, Jiang L, Song J. Clinical predictors of mortality due to COVID-19 based on an analysis of data of 150 patients from Wuhan, China. Intensive Care Med. 2020;46(5):846– 8. <https://doi.org/10.1007/s00134-020-05991-x>. |

**Appendix 5: Data Extraction Tables**
